# Supplementary material for: Diversity of Thrips Associated With Soybean Grown in Different Plant Arrangements
Source: Preprints.org preprint supplement (doi:10.20944/preprints202407.1173.v1), 2024-07-15
Supplement: Supplementary file 1 [file supplementary]

**Appendix A**

**Figure S1.** Pictures of selected thrips species (by co-author Marcin Cierpisz).

| 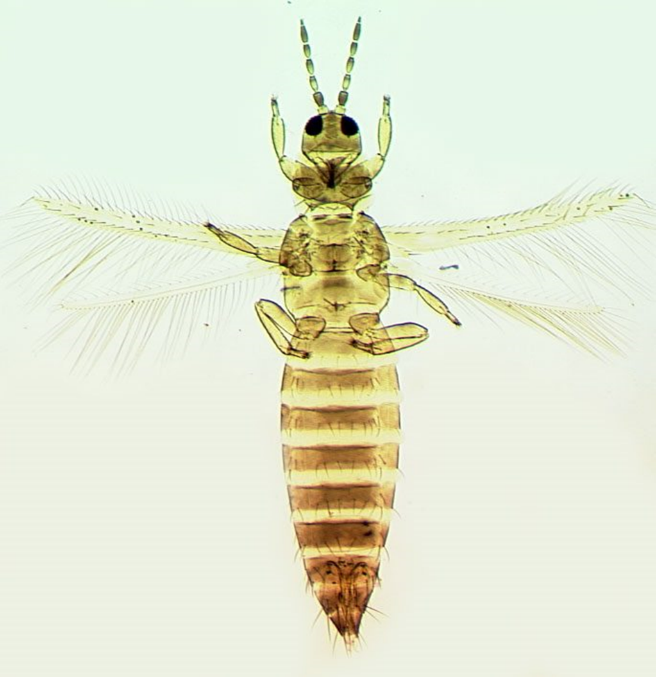 | 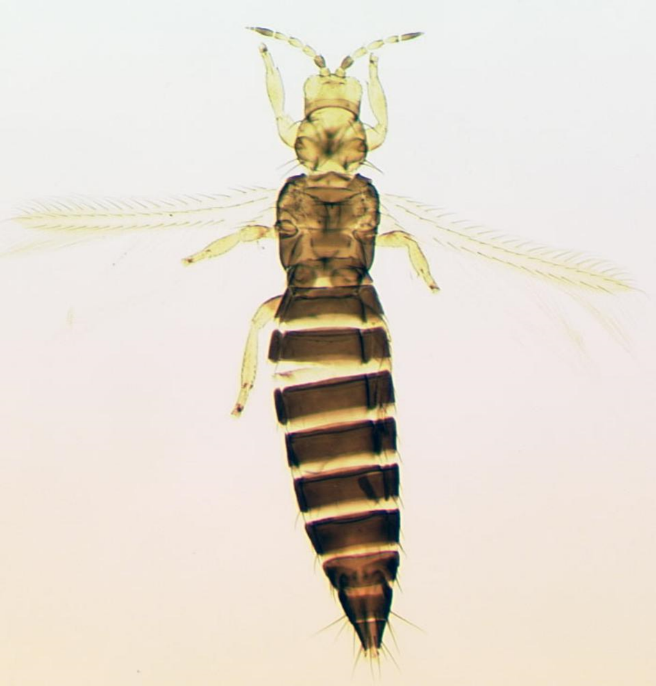 |
| --- | --- |
| A – *Thrips tabaci* – female | B *- Frankliniella intonsa* – female |
| 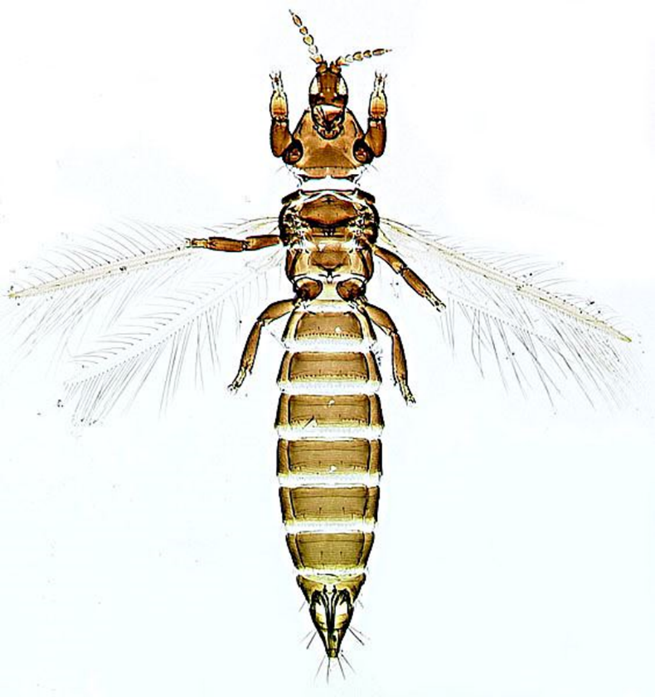 | 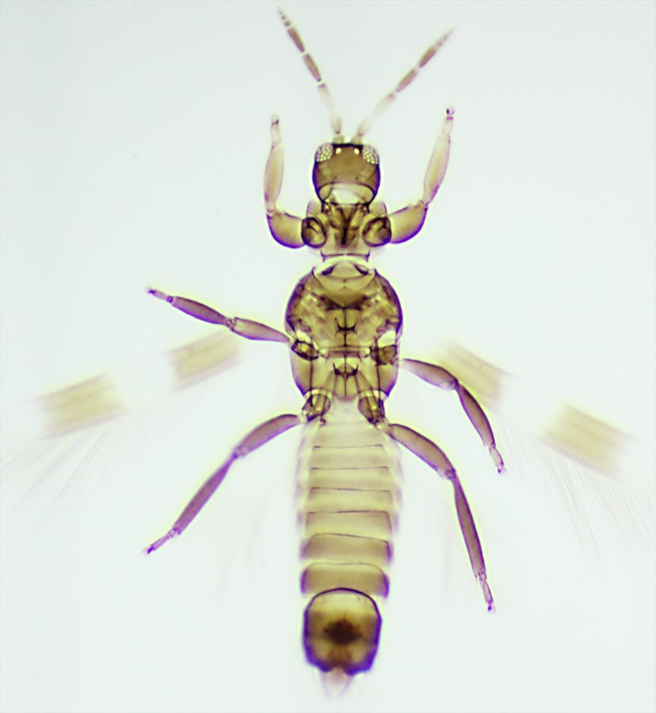 |
| C *- Chirothrips manicatus* – female | D *- Aeolothrips intermedius* - male |
